# Supplementary material for: The RNA-binding Protein MEX3B Mediates Resistance to Cancer Immunotherapy by Downregulating HLA-A Expression
Source: Oxford University Press journal article supplement (doi:10.1158/1078-0432.ccr-17-2483), 2018-03-01
Supplement: 10780432ccr172483-sup-188337_3_supp_4574799_p496pt.xlsx [file 10780432ccr172483-sup-188337_3_supp_4574799_p496pt.xlsx]

## Sheet: Major pathways
Regulation of PTEN stability and activity; datasource: reactome; organism: 9606; idtype: hgnc symbol	RAF/MAP kinase cascade; datasource: reactome; organism: 9606; idtype: hgnc symbol	Anchoring of the basal body to the plasma membrane; datasource: reactome; organism: 9606; idtype: hgnc symbol	EGF receptor signaling pathway; datasource: panther; organism: 9606; idtype: hgnc symbol	TGF-beta signaling pathway; datasource: panther; organism: 9606; idtype: hgnc symbol	Synthesis of PE; datasource: reactome; organism: 9606; idtype: hgnc symbol	Galactose catabolism; datasource: reactome; organism: 9606; idtype: hgnc symbol	ERKs are inactivated; datasource: reactome; organism: 9606; idtype: hgnc symbol	Hedgehog signaling pathway; datasource: panther; organism: 9606; idtype: hgnc symbol	VEGF signaling pathway ( VEGF signaling pathway ) ; datasource: inoh; organism: 9606; idtype: hgnc symbol	AKT(PKB)-Bad signaling ( IL-7 signaling(JAK1 JAK3 STAT5) ) ; datasource: inoh; organism: 9606; idtype: hgnc symbol	TGF_beta_Receptor; datasource: netpath; organism: 9606; idtype: hgnc symbol	PKA activation signaling ( GPCR Adenosine A2A receptor signaling pathway ) ; datasource: inoh; organism: 9606; idtype: hgnc symbol	Energy dependent regulation of mTOR by LKB1-AMPK; datasource: reactome; organism: 9606; idtype: hgnc symbol	Regulation of TP53 Activity through Phosphorylation; datasource: reactome; organism: 9606; idtype: hgnc symbol	Positive regulation of (Transcription of SOCS by STAT dimer) in JAK STAT pathway ( JAK-STAT pathway and regulation pathway Diagram ) ; datasource: inoh; organism: 9606; idtype: hgnc symbol	PI3K/AKT activation; datasource: reactome; organism: 9606; idtype: hgnc symbol	Metabolic pathways; datasource: kegg; organism: 9606; idtype: hgnc symbol	mevalonate pathway I; datasource: humancyc; organism: 9606; idtype: hgnc symbol
AKT1	ACTN2	ACTR1A	AKT1	ACVR1	CEPT1	GALE	DUSP3	BTRC	ACVR1	ACVR1	ACVRL1	ADCY1	CAB39	ATM	ACVR1	IRS1	A4GALT	ACAA1
AKT2	AKAP9	AHI1	AKT2	ACVR1B	CHKA	GALK1	DUSP4	CREBBP	ACVR1B	ACVR1B	AKT1	ADCY10	CAB39L	ATR	ACVR1B	IRS2	AADAT	ACAT1
AKT3	ANGPT1	AKAP9	AKT3	ACVR1C	CHKB	GALT	DUSP6	CSNK1A1	ACVR2A	ACVR2A	ANAPC1	ADCY2	LAMTOR1	ATRIP	ACVR2A	NGF	AANAT	ACAT2
CSNK2A1	ARTN	ALMS1	ARAF	ACVR2A	ETNK1	PGM1	DUSP7	CSNK1A1L	ACVR2B	ACVR2B	ANAPC10	ADCY3	LAMTOR2	AURKA	ACVR2B	NTRK1	AASS	HADHB
CSNK2A2	BTC	B9D1	AREG	ACVR2B	ETNK2	PGM2	MAPK1	CSNK1E	ACVRL1	ACVRL1	ANAPC2	ADCY4	LAMTOR3	AURKB	ACVRL1	PIK3CA	ABAT	HMGCR
CSNK2B	CALM1	B9D2	BRAF	ACVRL1	ETNPPL	PGM2L1	MAPK3	FBXW11	AKT1	AKT1	ANAPC4	ADCY5	LAMTOR4	BARD1	AKT1	PIK3CB	ABO	HMGCS1
FRK	CALM2	C2CD3	BTC	AMHR2	LPIN1		MAPK7	GLI1	AKT2	AKT2	ANAPC5	ADCY6	LAMTOR5	BLM	AKT2	PIK3R1	ACAA2	HMGCS2
MKRN1	CALM3	CC2D2A	CBL	ATF2	LPIN2		PPP2CA	GLI3	AKT3	AKT3	ANAPC7	ADCY7	MLST8	BRCA1	AKT3	PIK3R2	ACACA	IDI1
NEDD4	CAMK2A	CCP110	CBLB	BAMBI	LPIN3		PPP2CB	GSK3B	ALK	ALK	AP2B1	ADCY8	MTOR	BRIP1	ALK	RHOA	ACAD8	IDI2
OTUD3	CAMK2B	CDK1	CBLC	BMP1	PCYT2		PPP2R1A	PRKAR1A	AMHR2	AMHR2	AR	ADCY9	PPM1A	CCNA1	AMHR2		ACADL	MVD
PREX2	CAMK2D	CDK5RAP2	DAB2IP	BMP10	PHOSPHO1		PPP2R1B	PRKAR1B	ARAF	ARAF	ARRB2	GNAS	PRKAA1	CCNA2	ARAF		ACADM	MVK
PSMA1	CAMK2G	CENPJ	EGF	BMP15	PISD		PPP2R5D	PRKAR2A	BAD	BAD	ATF2	PRKACA	PRKAA2	CDK2	BMPR1A		ACADS	PMVK
PSMA2	CSF2	CEP131	EGFR	BMP2	SELENOI		VRK3	PRKAR2B	BMPR1A	BMPR1A	ATF3	PRKACB	PRKAB1	CDK5	BMPR1B		ACADSB
PSMA3	CSF2RA	CEP135	ERBB2	BMP3				PTCH1	BMPR1B	BMPR1B	AXIN1	PRKACG	PRKAB2	CDK5R1	BMPR2		ACADVL
PSMA4	CSF2RB	CEP152	ERBB3	BMP4				SHH	BMPR2	BMPR2	AXIN2	PRKAR1A	PRKAG1	CHEK1	BRAF		ACAT1
PSMA5	DLG4	CEP162	ERBB4	BMP5				SMO	BRAF	BRAF	BCAR1	PRKAR1B	PRKAG2	CHEK2	BTK		ACLY
PSMA6	EGF	CEP164	EREG	BMP6				STK36	BTK	BTK	BRCA1	PRKAR2A	PRKAG3	CSNK2A1	CAMK2A		ACMSD
PSMA7	EGFR	CEP192	GAB1	BMP7				SUFU	CAMK2A	CAMK2A	BTRC	PRKAR2B	RHEB	CSNK2A2	CAMK2B		ACOT2
PSMA8	ERBB2	CEP250	GAB2	BMP8A				UBR5	CAMK2B	CAMK2B	CAMK2A		RPTOR	CSNK2B	CAMK2D		ACOX2
PSMB1	ERBB3	CEP290	GAB3	BMP8B					CAMK2D	CAMK2D	CAMK2B		RRAGA	DNA2	CAMK2G		ACOX3
PSMB10	ERBB4	CEP41	GRAP	BMPR1A					CAMK2G	CAMK2G	CAMK2D		RRAGB	DYRK2	CCNH		ACSL4
PSMB11	EREG	CEP57	HBEGF	BMPR1B					CCNH	CCNH	CAMK2G		RRAGC	EXO1	CDC7		ACSM5
PSMB2	FGF1	CEP63	HRAS	BMPR2					CDC7	CDC7	CAV1		RRAGD	HIPK1	CDK1		ACSS2
PSMB3	FGF10	CEP70	MAP2K1	CITED1					CDK1	CDK1	CCNB2		SLC38A9	HIPK2	CDK2		ACSS3
PSMB4	FGF16	CEP72	MAP2K2	CITED2					CDK2	CDK2	CCND1		STK11	HUS1	CDK3		ACY1
PSMB5	FGF17	CEP76	MAP2K3	CREBBP					CDK3	CDK3	CCNE1		STRADA	KAT5	CDK4		ADA
PSMB6	FGF18	CEP78	MAP2K4	DCP1B					CDK4	CDK4	CD44		STRADB	MAPK11	CDK5		ADH5
PSMB7	FGF19	CEP83	MAP2K6	EP300					CDK5	CDK5	CDC16		TSC1	MAPK14	CDK6		ADI1
PSMB8	FGF2	CEP89	MAP2K7	FKBP1A					CDK6	CDK6	CDC23		TSC2	MAPKAPK5	CDK7		ADK
PSMB9	FGF20	CEP97	MAP3K2	FKBP1B					CDK7	CDK7	CDC25A			MDM2	CDK8		ADO
PSMC1	FGF22	CETN2	MAP3K3	FKBP2					CDK8	CDK8	CDC27			MDM4	CDK9		ADPGK
PSMC2	FGF23	CKAP5	MAP3K4	FOSL1					CDK9	CDK9	CDK1			MRE11	CHUK		ADSL
PSMC3	FGF3	CLASP1	MAP3K5	FOXH1					CHUK	CHUK	CDK2			NBN	CSK		ADSS
PSMC4	FGF4	CNTRL	MAPK1	GDF1					CSK	CSK	CDK4			NOC2L	CSNK1A1		AFMID
PSMC5	FGF5	CSNK1D	MAPK10	GDF10					CSNK1A1	CSNK1A1	CDK6			NUAK1	CSNK1D		AGK
PSMC6	FGF6	CSNK1E	MAPK11	GDF11					CSNK1D	CSNK1D	CDKN1A			PIN1	CSNK1E		AGL
PSMD1	FGF7	DCTN1	MAPK12	GDF15					CSNK1E	CSNK1E	CHUK			PLK3	CSNK1G1		AGMAT
PSMD10	FGF8	DCTN2	MAPK13	GDF2					CSNK1G1	CSNK1G1	CITED1			PRKAA1	CSNK1G2		AGPAT1
PSMD11	FGF9	DCTN3	MAPK14	GDF3					CSNK1G2	CSNK1G2	COPS5			PRKAA2	CSNK1G3		AGPS
PSMD12	FGFR1	DYNC1H1	MAPK3	GDF5					CSNK1G3	CSNK1G3	CREBBP			PRKAB1	EGFR		AGXT
PSMD13	FGFR2	DYNC1I2	MAPK8	GDF6					EGFR	EGFR	CRK			PRKAB2	FGFR1		AHCYL1
PSMD14	FGFR3	DYNLL1	MAPK9	GDF7					FGFR1	FGFR1	CSNK1G2			PRKAG1	FGFR2		AK4
PSMD2	FGFR4	FBF1	MRAS	GDF9					FGFR2	FGFR2	CTCF			PRKAG2	FGFR3		AKR1A1
PSMD3	FRS2	FGFR1OP	NF1	GDNF					FGFR3	FGFR3	CTNNA1			PRKAG3	FGFR4		AKR1B1
PSMD4	FRS3	HAUS1	NRAS	HRAS					FGFR4	FGFR4	CTNNA2			RAD1	FLT1		AKR1B10
PSMD5	FYN	HAUS2	NRG1	INHBA					FLT1	FLT1	CTNNB1			RAD17	FLT4		AKR1C4
PSMD6	GDNF	HAUS3	NRG2	INHBB					FLT4	FLT4	CUL1			RAD50	FYN		AKR1D1
PSMD7	GFRA1	HAUS4	NRG3	INHBC					FYN	FYN	DAB2			RAD9A	GFRA1		ALAD
PSMD8	GFRA2	HAUS5	NRG4	INHBE					GFRA1	GFRA1	DAXX			RAD9B	GRK2		ALDH18A1
PSMD9	GFRA3	HAUS6	PEBP1	JUN					GRK2	GRK2	DCP1A			RBBP8	GRK3		ALDH1A1
PSME1	GFRA4	HAUS7	PEBP4	JUNB					GRK3	GRK3	DDX5			RFC2	GRK4		ALDH3A1
PSME2	GRB2	HAUS8	PHLDB2	JUND					GRK4	GRK4	DVL1			RFC3	GRK5		ALDH3A2
PSME3	GRIN1	HSP90AA1	PIK3C2A	LEFTY1					GRK5	GRK5	DYNC1I1			RFC4	GRK6		ALDH4A1
PSME4	GRIN2A	IQCB1	PIK3C2B	LEFTY2					GRK6	GRK6	DYNLRB1			RFC5	GRK7		ALDH5A1
PSMF1	GRIN2B	KIF24	PIK3C3	MAP3K7					GRK7	GRK7	DYNLRB2			RHNO1	GSK3A		ALDH6A1
PTEN	GRIN2C	MAPRE1	PIK3CA	MAP3K7CL					GSK3A	GSK3A	E2F4			RMI1	GSK3B		ALDH7A1
RNF146	GRIN2D	MARK4	PIK3CB	MAPK1					GSK3B	GSK3B	E2F5			RMI2	IGF1R		ALDOC
RPS27A	HBEGF	MKS1	PIK3CD	MAPK10					IGF1R	IGF1R	EID2			RPA1	IKBKB		ALG1
SEM1	HGF	NDE1	PIK3CG	MAPK11					IKBKB	IKBKB	EIF3I			RPA2	IKBKE		ALG10
STUB1	HRAS	NEDD1	PIK3R5	MAPK12					IKBKE	IKBKE	EIF4EBP1			RPA3	IKBKG		ALG11
TNKS	IL2	NEK2	PLCG1	MAPK13					IKBKG	IKBKG	ENG			RPS27A	INSR		ALG12
TNKS2	IL2RA	NINL	PLCG2	MAPK14					INSR	INSR	EP300			SSRP1	IRAK1		ALG13
TRIM27	IL2RB	NPHP1	PPP2CA	MAPK3					IRAK1	IRAK1	ERBIN			STK11	IRAK2		ALG14
UBA52	IL2RG	NPHP4	PPP2CB	MAPK8					IRAK2	IRAK2	ESR1			SUPT16H	IRAK4		ALG2
UBB	IL3	ODF2	PPP2R5A	MAPK9					IRAK4	IRAK4	ETS1			TAF1	ITK		ALG3
UBC	IL3RA	OFD1	PPP2R5B	MSTN					ITK	ITK	EWSR1			TAF10	JAK1		ALG5
USP13	IL5	PAFAH1B1	PPP2R5C	NODAL					JAK1	JAK1	FKBP1A			TAF11	JAK2		ALG6
WWP2	IL5RA	PCM1	PPP2R5D	NRAS					JAK2	JAK2	FNTA			TAF12	JAK3		ALG8
XIAP	IRS1	PCNT	PPP2R5E	RRAS					JAK3	JAK3	FOS			TAF13	KDR		ALG9
	IRS2	PLK1	PRKCA	SKI					KDR	KDR	FOSB			TAF1L	KIT		ALLC
	JAK1	PLK4	PRKCB	SKIL					KIT	KIT	FOXG1			TAF2	LCK		ALOX12
	JAK2	PPP2R1A	PRKCD	SMAD1					LCK	LCK	FOXH1			TAF3	LTK		ALOX12B
	JAK3	PRKACA	PRKCE	SMAD2					LTK	LTK	FOXO1			TAF4	MAP2K1		ALOX15
	KIT	PRKAR2B	PRKCG	SMAD3					MAP2K1	MAP2K1	FOXO3			TAF4B	MAP2K2		ALOX15B
	KITLG	RAB11A	PRKCH	SMAD4					MAP2K2	MAP2K2	FOXO4			TAF5	MAP2K3		ALOX5
	KL	RAB3IP	PRKCI	SMAD5					MAP2K3	MAP2K3	FZR1			TAF6	MAP2K4		ALPI
	KLB	RAB8A	PRKCQ	SMAD6					MAP2K4	MAP2K4	GIPC1			TAF7	MAP2K5		AMACR
	KRAS	RPGRIP1L	PRKCZ	SMAD7					MAP2K5	MAP2K5	GRB2			TAF7L	MAP2K6		AMD1
	LAT	SCLT1	PRKD1	SMAD9					MAP2K6	MAP2K6	GSK3B			TAF9	MAP2K7		AMDHD1
	MAPK1	SDCCAG8	PRKD2	SMURF1					MAP2K7	MAP2K7	HDAC1			TAF9B	MAP3K1		AMPD1
	MAPK3	2017-09-02	PRKD3	SMURF2					MAP3K1	MAP3K1	HGS			TBP	MAP3K10		AMT
	MET	SFI1	RAC1	SNIP1					MAP3K10	MAP3K10	HNF4A			TOP3A	MAP3K11		ANPEP
	NCAM1	SSNA1	RAC2	TAB1					MAP3K11	MAP3K11	HOXA9			TOPBP1	MAP3K12		AOC3
	NEFL	TCTN1	RAF1	TGFB2					MAP3K12	MAP3K12	HSPA8			TP53	MAP3K13		AOX1
	NRAS	TCTN2	RASA1	TGFB3					MAP3K13	MAP3K13	IKBKB			TP53INP1	MAP3K14		APIP
	NRG1	TCTN3	RASA2	TGFBR1					MAP3K14	MAP3K14	ING2			TP53RK	MAP3K2		APRT
	NRG2	TMEM216	RASA4	TGFBR2					MAP3K2	MAP3K2	IRF2BP1			TPX2	MAP3K21		ARG1
	NRG3	TMEM67	RASA4B	TLL1					MAP3K21	MAP3K21	ITCH			UBA52	MAP3K3		ARSB
	NRG4	TTBK2	RASAL2	TLL2					MAP3K3	MAP3K3	ITGB1			UBB	MAP3K5		ASAH1
	NRTN	TUBA1A	RRAS	ZFYVE16					MAP3K5	MAP3K5	ITGB3			UBC	MAP3K7		ASL
	PDGFA	TUBA4A	RRAS2	ZFYVE9					MAP3K7	MAP3K7	JUN			WRN	MAP3K8		ASMT
	PDGFB	TUBB	SFN						MAP3K8	MAP3K8	JUNB				MAP3K9		ASNS
	PDGFRA	TUBB4A	SHC1						MAP3K9	MAP3K9	JUND				MAP4K2		ASPG
	PDGFRB	TUBB4B	SHC2						MAP4K2	MAP4K2	KAT2B				MAP4K3		ASS1
	PEA15	TUBG1	SHC3						MAP4K3	MAP4K3	KLF10				MAPK1		ATIC
	PSPN	YWHAE	SOS1						MAPK1	MAPK1	KPNB1				MAPK10		AUH
	PTK2	YWHAG	SOS2						MAPK10	MAPK10	LEF1				MAPK11		AZIN2
	PTPRA		SPRY1						MAPK11	MAPK11	MAP2K1				MAPK12		B3GALNT1
	RANBP9		SPRY2						MAPK12	MAPK12	MAP2K2				MAPK13		B3GALT1
	RAPGEF2		SPRY3						MAPK13	MAPK13	MAP2K3				MAPK14		B3GALT2
	RASGEF1A		SPRY4						MAPK14	MAPK14	MAP2K6				MAPK3		B3GALT4
	RASGRF1		STAT1						MAPK3	MAPK3	MAP3K7				MAPK7		B3GALT5
	RASGRF2		STAT2						MAPK7	MAPK7	MAP4K1				MAPK8		B3GALT6
	RASGRP1		STAT3						MAPK8	MAPK8	MAPK1				MAPK9		B3GAT2
	RASGRP3		STAT4						MAPK9	MAPK9	MAPK14				MAPKAPK2		B3GNT3
	RASGRP4		STAT5A						MAPKAPK2	MAPKAPK2	MAPK3				MAPKAPK3		B3GNT5
	RET		STAT5B						MAPKAPK3	MAPKAPK3	MAPK8				MAPKAPK5		B3GNT6
	SHC1		STAT6						MAPKAPK5	MAPKAPK5	MED15				MET		B4GALNT1
	SHC2		TGFA						MET	MET	MEF2A				MKNK1		B4GALT1
	SHC3		YWHAB						MKNK1	MKNK1	MEF2C				MNAT1		B4GALT2
	SOS1		YWHAE						MNAT1	MNAT1	MTOR				MOS		B4GALT3
	SPTA1		YWHAG						MOS	MOS	MYC				MTOR		B4GALT4
	SPTAN1		YWHAH						MTOR	MTOR	NCOA1				NGFR		B4GALT6
	SPTB		YWHAQ						NGFR	NGFR	NEDD4L				NLK		B4GALT7
	SPTBN1		YWHAZ						NLK	NLK	NFKB1				NTRK1		B4GAT1
	SPTBN2								NTRK1	NTRK1	NFKBIA				PAK1		BAAT
	SPTBN4								PAK1	PAK1	NFYA				PAK2		BCAT2
	SPTBN5								PAK2	PAK2	NFYB				PAK4		BCO1
	TEK								PAK4	PAK4	NFYC				PAK5		BDH1
									PAK5	PAK5	NME1				PAK6		BHMT
									PAK6	PAK6	NUP153				PDGFRA		BPGM
									PDGFRA	PDGFRA	NUP214				PDGFRB		BPNT1
									PDGFRB	PDGFRB	OLIG1				PDPK1		BTD
									PDPK1	PDPK1	PARD3				PLK1		C1GALT1
									PIK3CA	PLK1	PARD6A				PLK3		CAD
									PIK3CB	PLK3	PDK1				PRKAA1		CBR1
									PIK3CD	PRKAA1	PDPK1				PRKAA2		CBS
									PIK3R1	PRKAA2	PIAS1				PRKAB1		CD38
									PLCG1	PRKAB1	PIAS2				PRKAB2		CDA
									PLCG2	PRKAB2	PIK3CA				PRKACA		CDIPT
									PLK1	PRKACA	PIK3R1				PRKACB		CDO1
									PLK3	PRKACB	PIK3R2				PRKACG		CDS1
									PRKAA1	PRKACG	PJA1				PRKAG1		CERS1
									PRKAA2	PRKAG1	PML				PRKAG2		CES2
									PRKAB1	PRKAG2	PPM1A				PRKAG3		CES5A
									PRKAB2	PRKAG3	PPP1CC				PRKAR1A		CHKA
									PRKACA	PRKAR1A	PPP1R15A				PRKAR1B		CHPF2
									PRKACB	PRKAR1B	PPP2CA				PRKAR2A		CHSY1
									PRKACG	PRKAR2A	PPP2R1A				PRKAR2B		CKMT2
									PRKAG1	PRKAR2B	PPP2R2A				PRKCA		CMAS
									PRKAG2	PRKCA	PRKAR1B				PRKCB		CMBL
									PRKAG3	PRKCB	PRKAR2A				PRKCD		CNDP1
									PRKAR1A	PRKCD	PTK2				PRKCE		CNDP2
									PRKAR1B	PRKCE	PXN				PRKCG		COASY
									PRKAR2A	PRKCG	RAF1				PRKCH		COMT
									PRKAR2B	PRKCH	RB1				PRKCI		COQ2
									PRKCA	PRKCI	RBL1				PRKCQ		COQ3
									PRKCB	PRKCQ	RBL2				PRKCZ		COQ5
									PRKCD	PRKCZ	RBX1				PRKG1		COQ6
									PRKCE	PRKG1	RHOA				PRKG2		COQ7
									PRKCG	PRKG2	RNF111				PTK2		CPOX
									PRKCH	PTK2	ROCK1				PTK2B		CPS1
									PRKCI	PTK2B	RPS6KA5				RAF1		CRLS1
									PRKCQ	RAF1	RPS6KB1				RIPK1		CRYL1
									PRKCZ	RIPK1	RUNX1				RIPK2		CS
									PRKG1	RIPK2	RUNX2				RIPK3		CSAD
									PRKG2	RIPK3	RUNX3				RPS6KA1		CSGALNACT2
									PTK2	RPS6KA1	SAMD3				RPS6KA2		CTH
									PTK2B	RPS6KA2	SDC2				RPS6KA3		CTPS1
									RAF1	RPS6KA3	SHC1				RPS6KA6		CYP11A1
									RIPK1	RPS6KA6	SIK1				RPS6KB1		CYP11B1
									RIPK2	RPS6KB1	SKI				RPS6KB2		CYP11B2
									RIPK3	RPS6KB2	SKIL				RYK		CYP17A1
									RPS6KA1	RYK	SKP1				SRC		CYP19A1
									RPS6KA2	SRC	SMAD2				STAT1		CYP1A1
									RPS6KA3	SYK	SMAD3				STAT2		CYP1A2
									RPS6KA6	TEC	SMAD4				STAT3		CYP21A2
									RPS6KB1	TGFBR1	SMAD6				STAT4		CYP27A1
									RPS6KB2	TGFBR2	SMAD7				STAT5A		CYP27B1
									RYK	TYK2	SMURF1				STAT5B		CYP2E1
									SH2D2A	WEE1	SMURF2				STAT6		CYP2J2
									SRC	YWHAQ	SNIP1				SYK		CYP2R1
									SYK	ZAP70	SNW1				TEC		CYP2U1
									TEC		SNX1				TGFBR1		CYP3A43
									TGFBR1		SNX2				TGFBR2		CYP4A11
									TGFBR2		SNX4				TYK2		CYP4A22
									TYK2		SNX6				WEE1		CYP4F3
									VEGFA		SOS1				ZAP70		CYP51A1
									VEGFB		SOX9						CYP7A1
									VEGFC		SP1						CYP8B1
									VEGFD		SPARC						DAD1
									WEE1		SPTBN1						DAO
									ZAP70		SRC						DBH
											STAMBPL1						DBT
											STK11						DCK
											STK11IP						DCT
											STRAP						DCTD
											SUMO1						DCXR
											TAB1						DDC
											TCF4						DEGS1
											TFDP1						DGUOK
											TFDP2						DHCR24
											TGFB1						DHCR7
											TGFB2						DHFR
											TGFB3						DHODH
											TGFBR1						DLD
											TGFBR2						DLST
											TGFBR3						DMGDH
											TGIF1						DNMT3L
											TP53						DOLK
											TP73						DPAGT1
											TRAF6						DPM1
											TRAP1						DPM2
											TRIM33						DPM3
											UBE2D1						DPYD
											UBE2D2						DPYS
											UBE2D3						DTYMK
											UBE2I						DUT
											UCHL5						EARS2
											VDR						EBP
											VPS39						ECHS1
											WWP1						EHHADH
											WWTR1						ENPP1
											XPO1						EPHX2
											XPO4						EXT1
											YAP1						EXTL1
											ZEB1						EXTL3
											ZEB2						FAH
											ZFYVE16						FASN
											ZFYVE9						FAXDC2
																	FBP1
																	FDFT1
																	FDPS
																	FECH
																	FH
																	FLAD1
																	FPGS
																	FPGT
																	FTCD
																	FUK
																	FUT3
																	FUT4
																	FUT5
																	FUT7
																	FUT8
																	FUT9
																	G6PC2
																	G6PD
																	GAL3ST1
																	GALC
																	GALE
																	GALNS
																	GALNT4
																	GALT
																	GAMT
																	GANAB
																	GANC
																	GAPDH
																	GART
																	GATM
																	GBA
																	GBE1
																	GBGT1
																	GCDH
																	GCH1
																	GCK
																	GCLM
																	GCNT1
																	GCNT2
																	GCNT3
																	GCNT4
																	GDA
																	GFPT1
																	GGPS1
																	GGT5
																	GK2
																	GLB1
																	GLDC
																	GLS
																	GLUD2
																	GLUL
																	GLYCTK
																	GMDS
																	GMPPB
																	GMPS
																	GNE
																	GNPDA2
																	GNS
																	GOT1
																	GOT2
																	GPAT3
																	GPI
																	GPT2
																	GRHPR
																	GSS
																	GSTZ1
																	GUK1
																	GUSB
																	H6PD
																	HAAO
																	HADH
																	HADHA
																	HAL
																	HAO2
																	HDC
																	HEXA
																	HGD
																	HGSNAT
																	HIBADH
																	HIBCH
																	HLCS
																	HMBS
																	HMGCL
																	HMGCR
																	HPD
																	HPGDS
																	HPRT1
																	HPSE
																	HSD11B2
																	HSD17B10
																	HSD17B3
																	HSD17B4
																	HSD17B6
																	HSD17B7
																	HSD3B1
																	HSD3B7
																	HYAL1
																	HYI
																	IDH1
																	IDI1
																	IDO2
																	IDS
																	IDUA
																	IL4I1
																	IMPA2
																	INPP1
																	INPP4B
																	INPP5B
																	INPP5J
																	IPPK
																	ISYNA1
																	ITPA
																	ITPK1
																	ITPKB
																	IVD
																	KDSR
																	KHK
																	KMO
																	KYAT1
																	KYNU
																	LAP3
																	LCT
																	LDHAL6A
																	LIAS
																	LIPT1
																	LIPT2
																	LPCAT2
																	LPCAT4
																	LSS
																	LTA4H
																	LTC4S
																	MAN1B1
																	MAN2A2
																	MAT2B
																	MCAT
																	MCCC2
																	MCEE
																	MDH1
																	ME2
																	ME3
																	MECR
																	MGAM
																	MGAT1
																	MGAT2
																	MGAT3
																	MGAT4B
																	MGAT4C
																	MGAT5
																	MGLL
																	MLYCD
																	MMAB
																	MOCS1
																	MOCS2
																	MOGAT3
																	MOGS
																	MPI
																	MPST
																	MRI1
																	MTAP
																	MTHFD1
																	MTHFD2L
																	MTHFR
																	MTHFS
																	MTM1
																	MTR
																	MUT
																	MVD
																	MVK
																	NADK
																	NADSYN1
																	NAGLU
																	NAGS
																	NANP
																	NANS
																	NAPRT
																	NME5
																	NMNAT3
																	NNMT
																	NNT
																	NOS3
																	NSDHL
																	NT5C
																	NTPCR
																	OAT
																	ODC1
																	OLAH
																	OTC
																	OXSM
																	PAFAH2
																	PAH
																	PAICS
																	PAPOLA
																	PAPSS2
																	PC
																	PCCA
																	PCK2
																	PCYT1A
																	PCYT2
																	PDHB
																	PDXK
																	PDXP
																	PEMT
																	PFAS
																	PFKP
																	PGD
																	PGK2
																	PGLS
																	PGP
																	PGS1
																	PHGDH
																	PHOSPHO1
																	PI4KB
																	PIGA
																	PIGB
																	PIGC
																	PIGF
																	PIGH
																	PIGL
																	PIGM
																	PIGN
																	PIGO
																	PIGP
																	PIGQ
																	PIGV
																	PIGW
																	PIGX
																	PIGY
																	PIK3C3
																	PIP5K1B
																	PIPOX
																	PISD
																	PLA2G16
																	PLA2G2A
																	PLCE1
																	PLD1
																	PLPP3
																	PMM1
																	PMVK
																	PNLIPRP2
																	PNMT
																	PNP
																	PNPO
																	POLE
																	POLR3K
																	PON1
																	PPAT
																	PPCDC
																	PPCS
																	PPOX
																	PPT1
																	PRDX4
																	PRDX6
																	PRODH
																	PRODH2
																	PRPS2
																	PSAT1
																	PSPH
																	PTDSS1
																	PTDSS2
																	PTGES
																	PTGIS
																	PTGS2
																	PTS
																	PYCR3
																	QARS
																	QDPR
																	QPRT
																	RDH11
																	RFK
																	RGN
																	RPEL1
																	RPIA
																	RRM1
																	SARDH
																	SAT2
																	SC5D
																	SCLY
																	SCP2
																	SDHA
																	SDR16C5
																	SDS
																	SEPHS1
																	SGMS1
																	SGMS2
																	SGPL1
																	SGSH
																	SHMT1
																	SI
																	SLC27A5
																	SMPD1
																	SMS
																	SORD
																	SPHK2
																	SPR
																	SPTLC1
																	SQLE
																	SRM
																	ST3GAL1
																	ST3GAL3
																	ST3GAL4
																	ST3GAL5
																	ST3GAL6
																	ST6GAL1
																	ST6GALNAC1
																	ST6GALNAC3
																	ST6GALNAC5
																	ST6GALNAC6
																	ST8SIA1
																	ST8SIA5
																	STT3B
																	SYNJ2
																	TALDO1
																	TAT
																	TBXAS1
																	TDO2
																	TGDS
																	TH
																	THTPA
																	TKFC
																	TKTL2
																	TM7SF2
																	TPI1
																	TPK1
																	TPO
																	TRIT1
																	TSTA3
																	TUBA8
																	TYMP
																	TYMS
																	TYR
																	TYRP1
																	UAP1
																	UCK1
																	UGCG
																	UGDH
																	UGP2
																	UGT8
																	UMPS
																	UPB1
																	UPP2
																	UPRT
																	URAD
																	UROC1
																	UROD
																	UROS
																	UXS1
																	XDH
																	XYLB
																	ZCCHC11
