# Supplementary material for: The RNA-binding Protein MEX3B Mediates Resistance to Cancer Immunotherapy by Downregulating HLA-A Expression
Source: Oxford University Press journal article supplement (doi:10.1158/1078-0432.ccr-17-2483), 2018-03-01
Supplement: 10780432ccr172483-sup-188337_3_supp_4574801_p49gpt.xlsx [file 10780432ccr172483-sup-188337_3_supp_4574801_p49gpt.xlsx]

## Sheet: All 384 ORFs in the library
ORF	Accession Number
CKS2	NM_001827.1
MAPKSP1	NM_021970.3
BRSK2	BC024291.1
C9orf95	NM_001127603.1
NME1	NM_198175.1
CIB4	NM_001029881.1
NME4	NM_005009.2
DGUOK	NM_080918.1
C1orf57	NM_032324.1
C9orf95	NM_017881.2
UCK1	BC015547.1
FXN	NM_000144.4
NME5	NM_003551.2
DTYMK	NM_012145.2
CSNK2B	NM_001320.5
AK3	NM_016282.2
RAGE	BC053536.1
PCTK3	BC040529.1
AK2	NM_013411.3
C21orf7	NM_020152.2
TPK1	NM_022445.3
XRCC6BP1	NM_033276.2
MYO3A	BC045538.1
PRKAG1	NM_212461.1
MAST4	NM_198828.2
TP53RK	BC066309.1
PRKACB	NM_207578.1
NRBP2	NM_178564.2
DCK	NM_000788.2
TSSK3	NM_052841.3
COASY	NM_001042531.1
PRKAB1	NM_006253.4
TSSK6	NM_032037.2
DGUOK	NM_080916.1
MAPK15	BC028034.1
MAPK10	NM_138981.1
PRKY	BC074851.2
EPHA7	BC027940.1
CDK10	NM_001098533.2
CDC2	NM_001786.3
GK5	BC032470.1
NEK7	NM_133494.2
CRKL	NM_005207.3
CDK3	NM_001258.2
TTN	BC013396.2
CDK5R1	NM_003885.2
FN3KRP	NM_024619.3
AURKC	NM_001015878.1
PIM2	NM_006875.3
PRKG1	BC062688.1
ZAP70	NM_207519.1
NEK6	NM_014397.4
PRPS1	NM_002764.3
PRPS2	NM_002765.3
RBKS	NM_022128.1
PBK	NM_018492.2
CDK6	NM_001259.6
PRKAG2	NM_024429.1
MAP2K6	NM_002758.3
CSNK1A1L	NM_145203.4
PDIK1L	NM_152835.3
TRIB2	NM_021643.3
UHMK1	BC026046.1
SNX16	NM_022133.3
CDK7	NM_001799.3
MOS	NM_005372.1
MAP2K3	NM_145109.2
STRADA	NM_153335.4
TWF2	NM_007284.3
PFTK2	BC038807.1
MORN1	BC021704.2
RP2	NM_006915.2
CSNK2A2	NM_001896.2
SGK196	NM_032237.3
PRKACA	NM_002730.3
CD2	BC033583.1
PRKACG	NM_002732.3
TNK2	BC008884.2
TRIB3	NM_021158.3
PRKX	NM_005044.3
MAPK14	NM_139012.2
STK19	NM_004197.1
SGK2	NM_170693.1
MAPK12	NM_002969.3
TSSK1B	NM_032028.3
CDK5R2	BC041771.1
PANK3	NM_024594.2
CDK9	NM_001261.3
NME7	NM_013330.3
MAPK3	NM_002746.2
CKB	NM_001823.3
CKM	BC007462.1
PRKAR1B	NM_002735.1
MAPKAPK3	NM_004635.3
CAMK1D	NM_153498.2
ADRBK2	BC036797.1
NME2	NM_002512.2
CIB1	NM_006384.3
PMVK	NM_006556.3
AK1	NM_000476.2
HSPB8	NM_014365.2
GUK1	NM_000858.5
TK1	NM_003258.4
PNCK	BC064422.1
IKBKB	BC006231.2
PRKAB2	NM_005399.3
EPHA10	NM_173641.2
PIM1	NM_002648.3
NAGK	NM_017567.3
PRKAR2A	BC002763.2
ETNK2	NM_018208.2
CSNK2A1	NM_001895.3
GALK1	NM_000154.1
SH3BP5L	NM_030645.1
MVK	NM_000431.2
C17orf75	NM_022344.2
VRK1	NM_003384.2
SPHK1	NM_021972.3
MAP2K4	BC060764.1
MAP2K2	NM_030662.3
EGFR	NM_201283.1
PDK3	NM_005391.3
PIP4K2A	NM_005028.4
PHKG2	NM_000294.1
PDK2	NM_002611.3
CSNK1D	NM_139062.1
PDK4	NM_002612.3
BCKDK	NM_005881.2
VRK3	BC023556.2
STK32B	BC038238.1
CSNK1G2	NM_001319.6
CSNK1D	NM_001893.3
RP6-213H19.1	NM_016542.3
IPMK	NM_152230.3
GAK	BC008668.1
PGK1	NM_000291.3
PRKAR2B	BC075800.1
UCKL1	BC033078.1
GSK3B	NM_001146156.1
PIP4K2C	BC028596.2
AGK	NM_018238.3
STYK1	BC093824.1
MAPK9	NM_002752.4
PIK3R1	NM_181524.1
HKDC1	BC021278.2
MAPK8	NM_139047.1
SGK2	NM_016276.3
STK24	NM_001032296.2
SGK1	NM_005627.3
HSN2	NM_213655.2
STK40	NM_032017.1
MGC42105	NM_153361.2
FGGY	BC014947.1
IP6K1	NM_153273.3
NADK	BC001709.1
SEPHS2	NM_012248.2
MAP2K5	NM_145160.1
PXK	BC014479.1
PIKFYVE	NM_152671.3
PTK6	NM_005975.2
ILK	NM_001014794.1
ETNK1	NM_018638.4
CHKA	NM_001277.2
MAK	BC039825.1
STK38L	NM_015000.3
STK38	NM_007271.2
MKNK2	NM_199054.2
AKT3	NM_181690.1
GCK	NM_000162.3
MKNK1	NM_003684.4
MPP1	NM_002436.2
MAP3K8	NM_005204.2
PFKFB4	NM_004567.2
MAPKAPK5	NM_003668.2
MLKL	NM_152649.2
PCTK3	NM_002596.2
NTRK2	NM_001007097.1
CAMK2D	NM_172115.2
CAMK2A	BC040457.1
TTBK2	BC041876.1
CAMK2D	NM_172128.2
C9orf98	NM_152572.2
AKT3	NM_005465.3
PI4K2A	NM_018425.2
NEK11	BC028587.2
FYN	NM_153048.1
RPS6KB2	BC006106.1
CLK1	NM_004071.3
PRKAG3	NM_017431.2
IPPK	NM_022755.4
STK3	NM_006281.2
ACVR1C	BC022530.1
PIK3R5	BC028212.1
SGK3	NM_013257.3
PCTK1	NM_006201.3
CLK2	NM_003993.2
CAMKK2	NM_153500.1
PKMYT1	NM_004203.3
CAMK2D	NM_001221.3
PIP5K1A	NM_001135637.1
CAMKV	NM_024046.3
BMPR1B	NM_001203.2
CDC2L6	NM_015076.3
ADCK4	NM_001142555.1
CAMK2B	NM_172081.2
HCK	ENST00000375852
CAMKK1	NM_032294.2
PFKFB2	NM_006212.2
ACVR1B	NM_004302.3
BLK	NM_001715.2
MATK	NM_139355.2
VRK2	BC027854.1
LYN	NM_002350.2
ACVR2B	NM_001106.3
ACVR2A	NM_001616.3
TRIM27	NM_006510.4
STK33	BC031231.1
RIOK3	NM_003831.3
DYRK4	NM_003845.1
PFKFB3	NM_004566.3
PNKP	NM_007254.2
PLXNA4	BC028744.2
NUP62	NM_012346.3
NUP62	BC003663.2
PCTK2	NM_002595.2
GLYCTK	NM_145262.3
ADCK1	NM_020421.3
GK	NM_000167.4
RPS6KA4	BC047896.1
ARSG	NM_014960.3
RPS6KB1	NM_003161.2
OXSR1	NM_005109.2
DYRK2	NM_003583.3
FGR	NM_005248.2
NRBP1	NM_013392.2
XYLB	NM_005108.2
FYN	NM_002037.3
CPNE3	BC036242.1
TNIK	BC055427.1
LCK	BC013200.1
EPHA3	NM_182644.2
RIPK2	NM_003821.5
TESK2	BC033085.1
CHEK2	NM_007194.3
YES1	NM_005433.3
GTF2H1	NM_005316.3
FASTK	NM_006712.3
PIP5K1B	BC030587.2
RPS6KA5	NM_182398.1
EIF2AK2	NM_002759.2
MPP2	BC030287.1
PRKAA2	NM_006252.3
RIOK2	BC000953.2
GK2	NM_033214.2
PDPK1	NM_002613.3
BRD3	BC032124.2
TGFBR2	NM_003242.5
SRPK3	NM_014370.2
RIOK1	NM_031480.2
DYRK3	BC015501.1
MEX3B	BC036211.1
PRKAA1	BC048980.1
DAK	NM_015533.3
MPP7	BC038105.2
ADCK5	NM_174922.3
MPP3	NM_001932.3
TXNDC3	BC036816.1
GRK6	BC017272.1
PAK4	NM_005884.3
CDKL3	NM_001113575.1
IRAK3	BC069388.1
DYRK2	NM_006482.2
PLK1	NM_005030.3
MAP3K7	NM_145331.1
ARAF	BC007514.2
PAPSS2	NM_004670.3
HIPK4	NM_144685.3
ZAP70	NM_001079.3
PCK1	BC023978.1
ADCK2	NM_052853.3
NUAK2	NM_030952.1
DYRK1B	NM_004714.1
DMPK	NM_004409.3
EIF2AK1	NM_014413.3
ICK	NM_014920.3
ITPKB	BC015009.1
WEE1	BC051831.1
CABC1	NM_020247.4
CALM2	NM_001743.4
CDK4	NM_000075.2
MAPK13	NM_002754.3
MAPK10	NM_002753.2
MAP2K7	BC038295.2
STK25	NM_006374.3
GSK3B	NM_002093.3
CSK	NM_004383.2
GALK2	NM_002044.2
CAMK4	NM_001744.3
AAK1	BC002695.2
CLK3	NM_003992.4
PKLR	NM_000298.5
MAP3K7	NM_003188.2
PCK2	BC001454.2
PLK3	NM_004073.2
RAF1	NM_002880.3
BTK	NM_000061.2
PRKCB	NM_212535.2
PRKCA	NM_002737.2
PRKCB	NM_002738.6
BMX	NM_001721.6
MPP5	NM_022474.2
PRKCD	NM_006254.3
C9orf96	BC036504.2
PAK6	NM_020168.4
ITPKC	NM_025194.2
SCYL3	BC014662.1
SRPK2	NM_182691.1
NEK8	NM_178170.2
SRPK2	NM_182692.1
FGFR2	NM_001144918.1
PRKCQ	NM_006257.2
FASTKD2	NM_014929.3
MARK2	NM_004954.4
EEF2K	BC032665.1
MARK3	BC024773.1
TBK1	NM_013254.2
FGFR1	NM_023106.2
RPS6KA2	NM_021135.4
RPS6KA1	NM_002953.3
DGKA	NM_001345.4
RPS6KA3	BC096303.1
RPS6KA6	NM_014496.2
SNRK	BC071567.1
DGKG	NM_001080744.1
PANK4	NM_018216.1
PFKM	NM_000289.4
PFKL	NM_002626.4
PFKP	NM_002627.3
MAST2	BC015816.2
GSG2	BC047457.1
BRD2	NM_005104.3
FGFR4	NM_002011.3
RPS6KA5	NM_004755.2
MAPK7	NM_002749.3
HIPK1	BC036057.1
DLG3	NM_021120.2
FGFR1	BC015035.1
MAP4K2	NM_004579.2
FGFR2	NM_000141.4
FGFR2	NM_022970.3
NTRK3	NM_002530.2
PI4KB	NM_002651.1
KSR2	BC127603.1
TBCKL	NM_033115.3
MAP4K5	NM_006575.3
TTK	NM_003318.3
IGFN1	BC131529.1
DDR1	NM_001954.4
PRKD2	NM_016457.4
DSTYK	BC053627.1
EXOSC10	NM_001001998.1
PKN3	NM_013355.3
TYRO3	NM_006293.2
DNAJC6	NM_014787.2
HK1	NM_033496.2
HK2	NM_000189.4
HK3	NM_002115.2
SCYL2	NM_017988.4
PKN1	BC040061.1
MAP3K14	NM_003954.2
MAP3K13	NM_004721.3
PLK4	NM_014264.3
EPHA2	NM_004431.2
NEK9	NM_033116.4
EPHB1	NM_004441.3
EPHA4	NM_004438.3
PTK2B	BC036651.2
STK31	BC059374.1
FXN	NM_181425.1
BUB1B	BC018739.1
PIK3CA	NM_006218.2
RET	BC004257.1
HIPK1	BC033012.2
FUK	NM_145059.2
